# Supplementary material for: Effective mass accommodation for partitioning of organic compounds into surface films with different viscosities
Source: Royal Society of Chemistry journal article supplement (doi:10.1039/d3em00213f), 2023-01-01
Supplement: d3em00213f1.pdf [file d3em00213f1.pdf]

**1 Supporting information for “Effective mass accommodation for partitioning**  
**2 of organic compounds into surface films with different viscosities”**

3 Pascale S. J. Lakey<sup>1,\*</sup>, Bryan E. Cummings<sup>2</sup>, Michael S. Waring<sup>2</sup>, Glenn C. Morrison<sup>3</sup> and Manabu  
4 Shiraiwa<sup>1,\*</sup>

5

6 <sup>1</sup> Department of Chemistry, University of California, Irvine, CA 92697, USA.

7 <sup>2</sup> Department of Civil, Architectural and Environmental Engineering, Drexel University, PA 19104, USA.

8 <sup>3</sup> Department of Environmental Sciences and Engineering, University of North Carolina, Chapel Hill, NC,  
9 USA.

10

11 \* [plakey@uci.edu](mailto:plakey@uci.edu); [m.shiraiwa@uci.edu](mailto:m.shiraiwa@uci.edu)

12

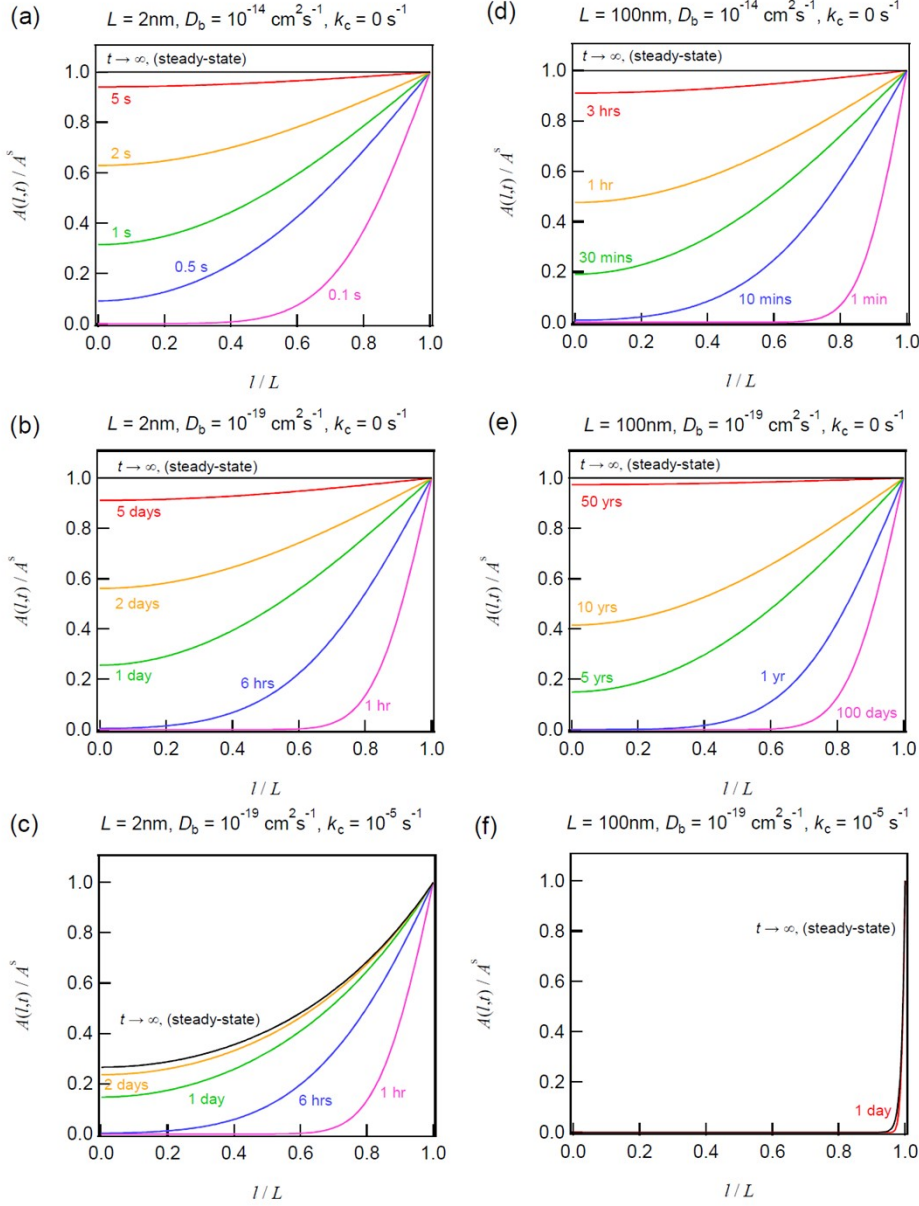

13

14 **Figure S1:** The temporal evolution of the normalized concentration profiles as a function of the normalized  
 15 distance from the bottom of the film for a (a-c) 2 nm film and (d-f) 100 nm film with different bulk diffusion  
 16 coefficients and first order reaction rate coefficients; (a)  $D_b = 10^{-14} \text{ cm}^2 \text{ s}^{-1}$ ,  $k_c = 0 \text{ s}^{-1}$ , (a)  $D_b = 10^{-19} \text{ cm}^2 \text{ s}^{-1}$ ,  
 17  $k_c = 0 \text{ s}^{-1}$ , (c)  $D_b = 10^{-19} \text{ cm}^2 \text{ s}^{-1}$ ,  $k_c = 10^{-5} \text{ s}^{-1}$ , (d) various  $q$  values which are a function of  $L$ ,  $D_b$  and  $k_c$ .

18

19

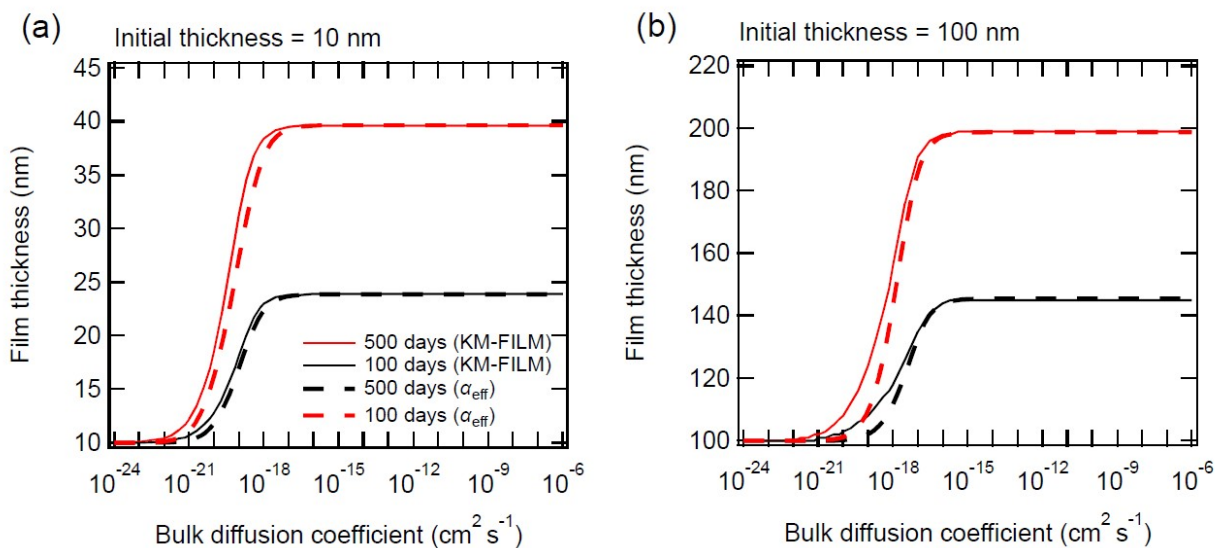

**Figure S2:** Film thicknesses as a function of bulk diffusion coefficients due to unreactive uptake of SVOCs after 100 days (black lines) and 500 days (red lines) for a film with an initial thickness of (a) 10 nm and (b) 100 nm.  $C_i$  is set to 20, 15, 10, 5 and  $2 \mu\text{g m}^{-3}$  for five  $\log K_{oa}$  bins of unit width centered around 8.5, 9.5, 10.5, 11.5 and 12.5, respectively. Solid lines represent results from the KM-FILM model and dashed lines are results from the  $\alpha_{\text{eff}}$  model.

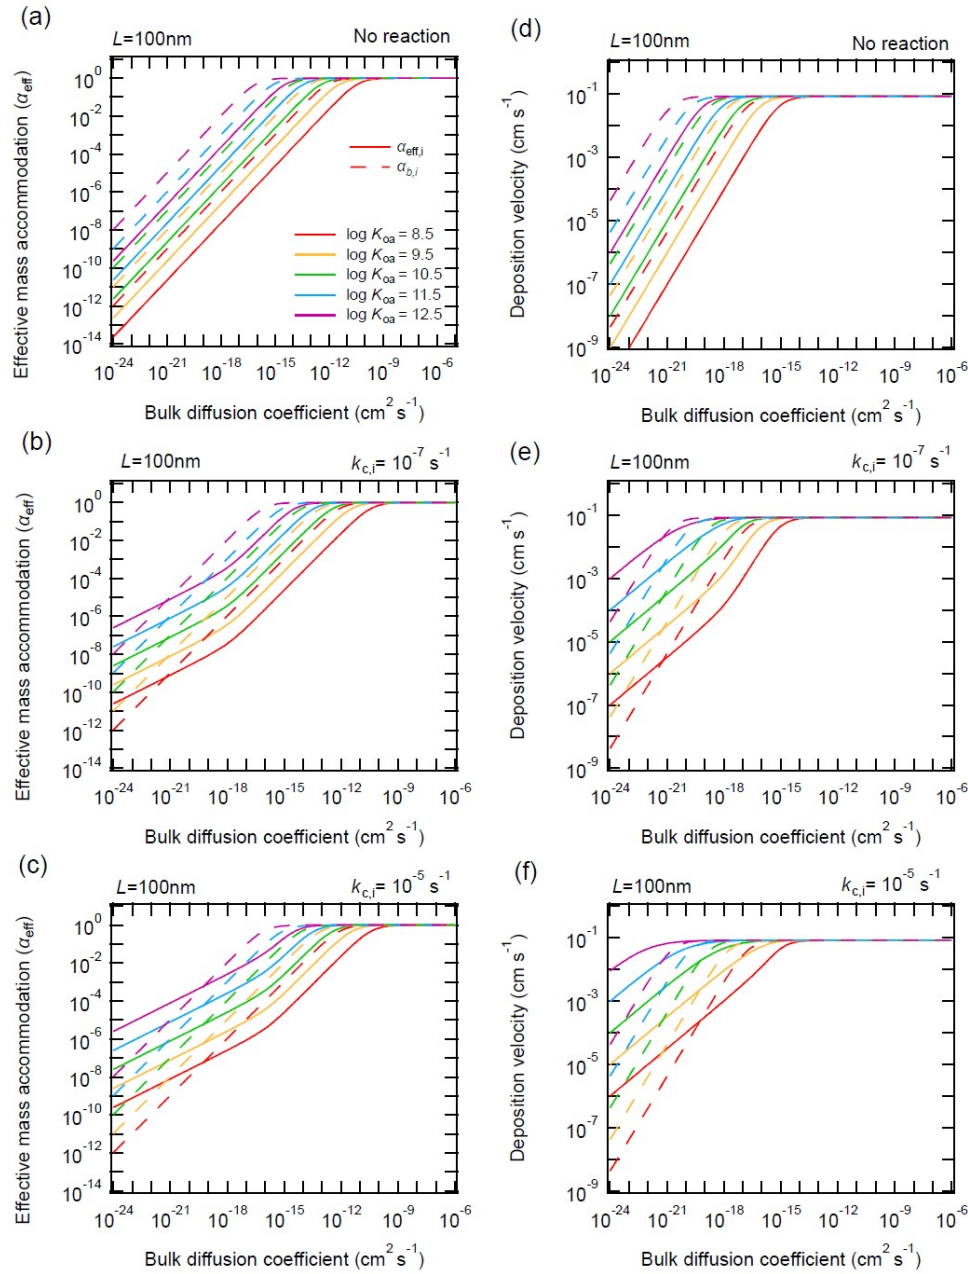

27

28 **Figure S3:** The impact of bulk diffusion coefficients on (a-c) the effective mass accommodation ( $\alpha_{\text{eff}}$ ) and  
 29 (d-f) the deposition velocity for a film with a thickness of 100 nm and for species with different  $\log K_{\text{oa}}$   
 30 values. The pseudo-first order rate coefficient of the different species are set to (a and d)  $0 \text{ s}^{-1}$  (b and e)  $10^{-7} \text{ s}^{-1}$   
 31  $10^{-7} \text{ s}^{-1}$  (c and f)  $10^{-5} \text{ s}^{-1}$ . In panels (a-c) the solid and dashed lines represent  $\alpha_{\text{eff}}$  and  $\alpha_b$ , respectively, and in  
 32 panels (d-f) the solid and dashed lines represent the deposition velocity when  $\alpha_{\text{eff}}$  and  $\alpha_b$  are used in equation  
 33 E1.

34

35

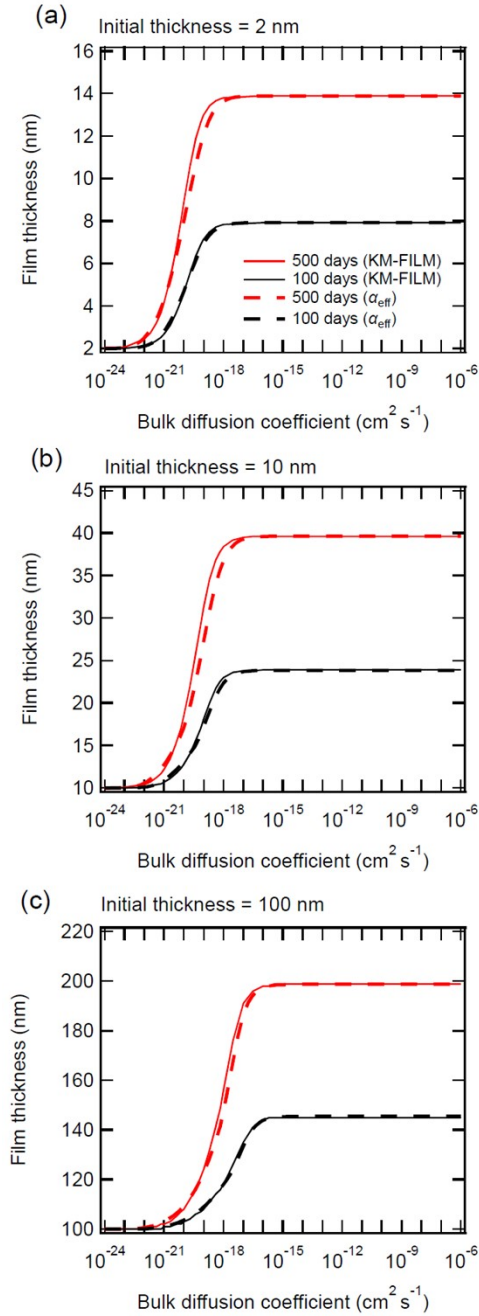

**Figure S4:** Film thicknesses as a function of bulk diffusion coefficients due unreactive uptake of SVOCs after 100 days (black lines) and 500 days (red lines) for a film with an initial thickness of (a) 2 nm and (b) 10 nm and (c) 100nm.  $C_t$  is set to 20, 15, 10, 5 and  $2 \mu\text{g m}^{-3}$  for five log  $K_{\text{oa}}$  bins of unit width centered around 8.5, 9.5, 10.5, 11.5 and 12.5, respectively. Solid lines represent results from the KM-FILM model and dashed lines are results from the  $\alpha_{\text{eff}}$  model. In this figure the penetration depth is set to  $(D_b t)^{0.5}$  where  $t$  is the time unless this exceeds  $L/3$ .

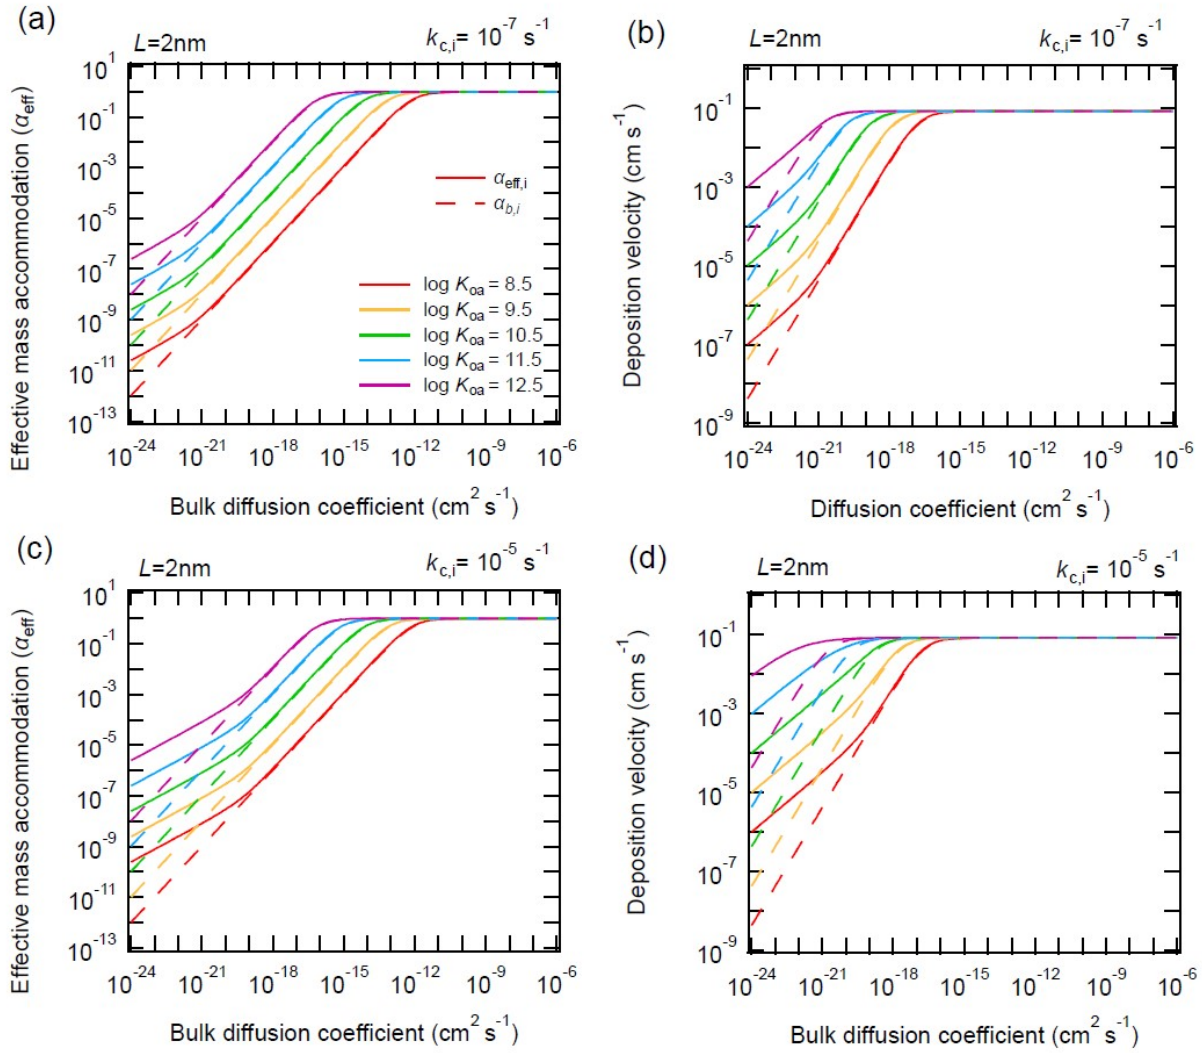

45

46 **Figure S5:** The impact of bulk diffusion coefficients on (a and c) the effective mass accommodation and  
 47 (b and d) the deposition velocity for a film with a thickness of 2 nm and for species with different  $\log K_{oa}$   
 48 values. The pseudo-first order rate coefficient of the different species are set to (a-b)  $10^{-7} \text{ s}^{-1}$  (c-d)  $10^{-5} \text{ s}^{-1}$ .  
 49 In panels (a-b) the solid and dashed lines represent  $\alpha_{eff}$  and  $\alpha_b$ , respectively, and in panels (c-d) the solid  
 50 and dashed lines represent the deposition velocity when  $\alpha_{eff}$  and  $\alpha_b$  are used in equation E1.

51

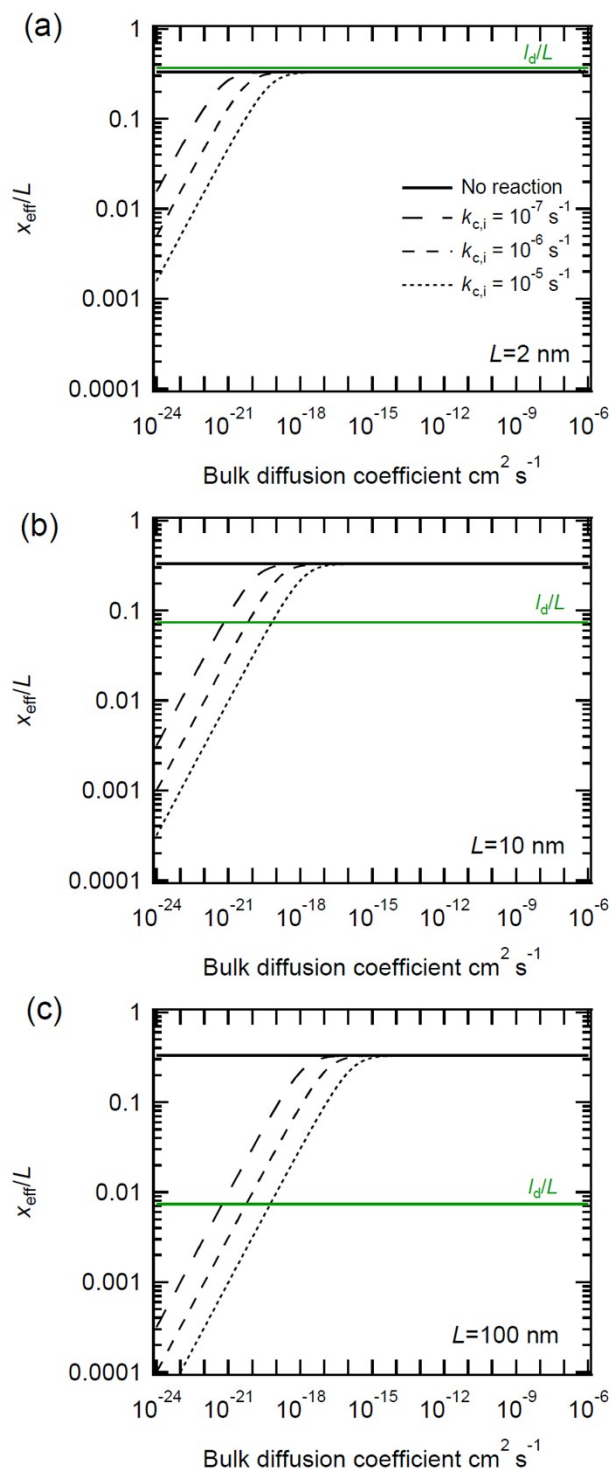

52

53 **Figure S6:** The penetration depth normalized to the total film thickness for different reaction rate  
 54 coefficients and for a total film thickness of (a) 2nm, (b) 10 nm and (c) 100 nm. The green line shows the  
 55 distance that a molecule must travel in order to be accommodated into the bulk normalized to the total film  
 56 thickness.

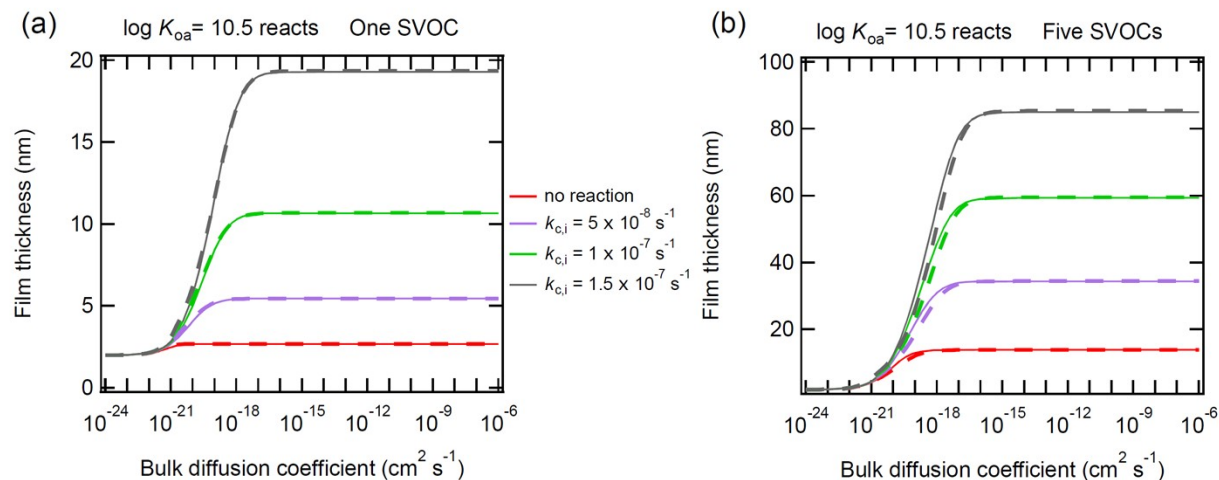

57

58 **Figure S7:** Film thicknesses as a function of bulk diffusion coefficients ( $D_b$ ) after 500 days for a film with  
 59 an initial thickness of 2 nm. A range of pseudo-first order reaction rate coefficients are shown for the log  
 60  $K_{oa}$  bin centered around 10.5. All other species do not react. In panel (a)  $C_t$  is set to  $10 \mu\text{g m}^{-3}$  for the log  
 61  $K_{oa}$  bin centered around 10.5 with the  $C_t$  for all other log  $K_{oa}$  bins set to  $0 \mu\text{g m}^{-3}$ . In panel (b)  $C_t$  is set to  
 62 20, 15, 10, 5, and  $2 \mu\text{g m}^{-3}$  for five log  $K_{oa}$  bins of unit width centered around 8.5, 9.5, 10.5, 11.5, and 12.5,  
 63 respectively. Solid lines represent results from the KM-FILM model and dashed lines are results from the  
 64  $\alpha_{\text{eff}}$  model.

65

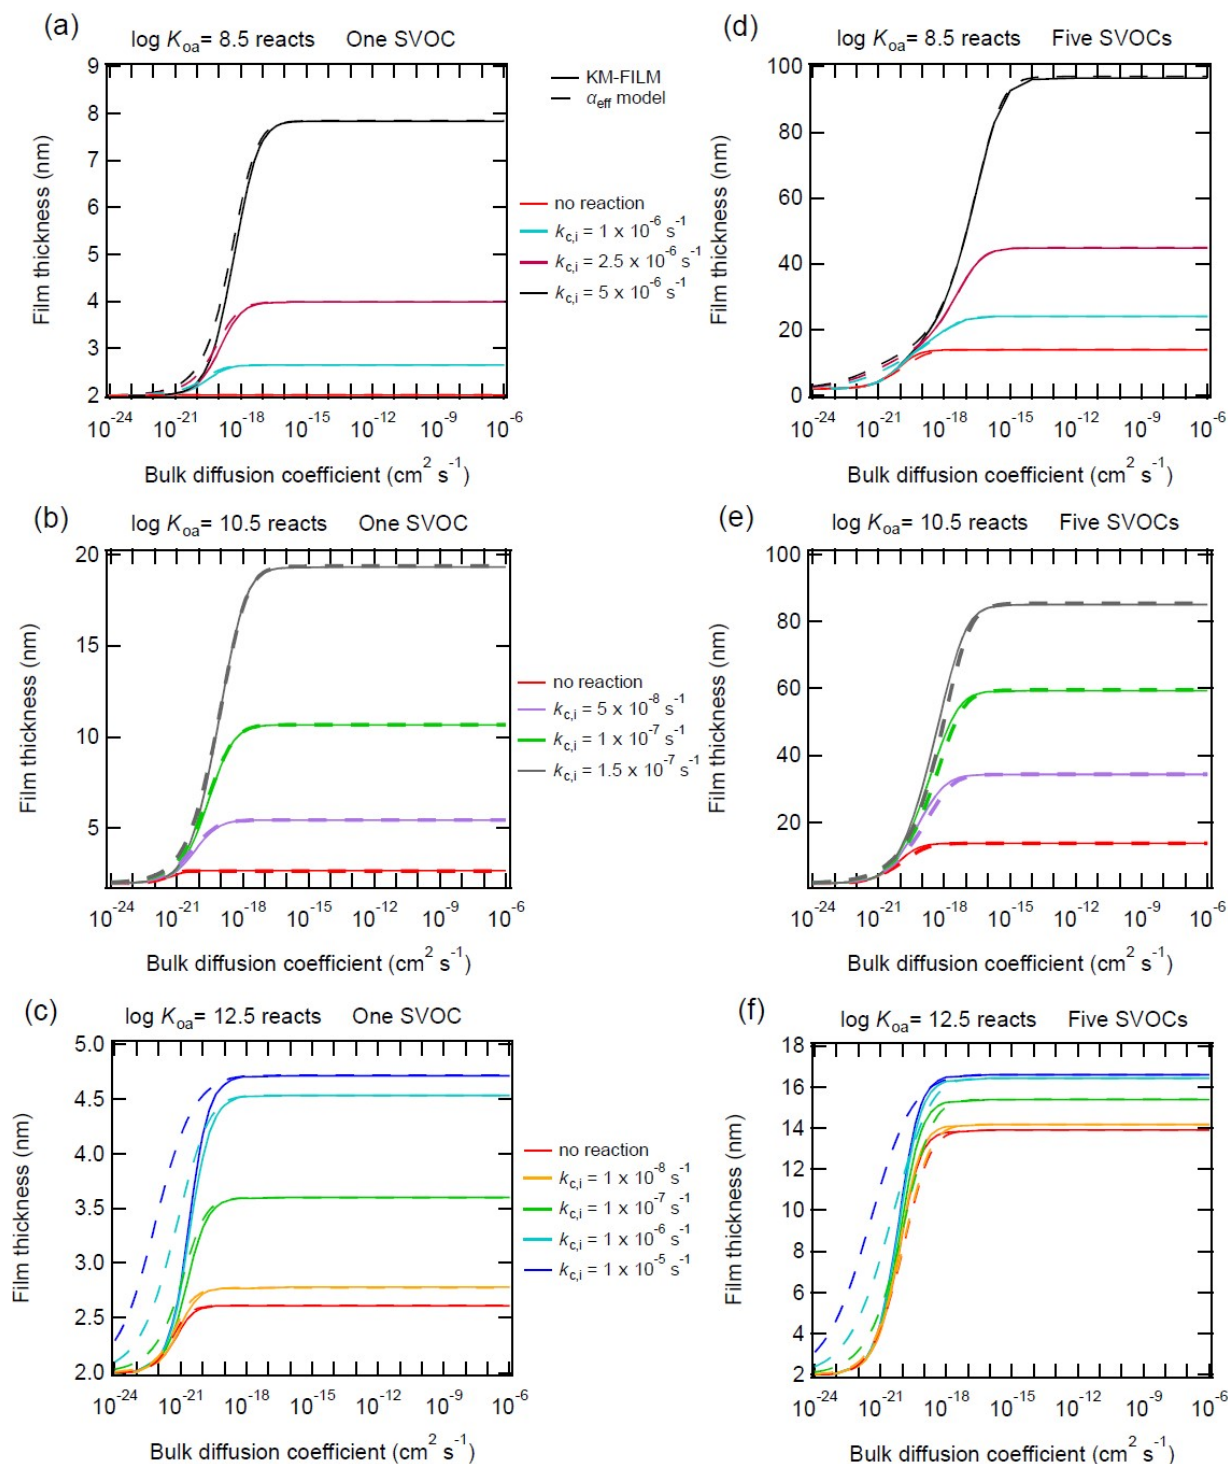

**Figure S8:** Film thicknesses as a function of bulk diffusion coefficients after 500 days for the conditions shown in Figure 6 and S7. Note that  $\alpha_{\text{eff}}$  has been used for all simulations even when  $\alpha_{\text{eff}} > \alpha_b$ .

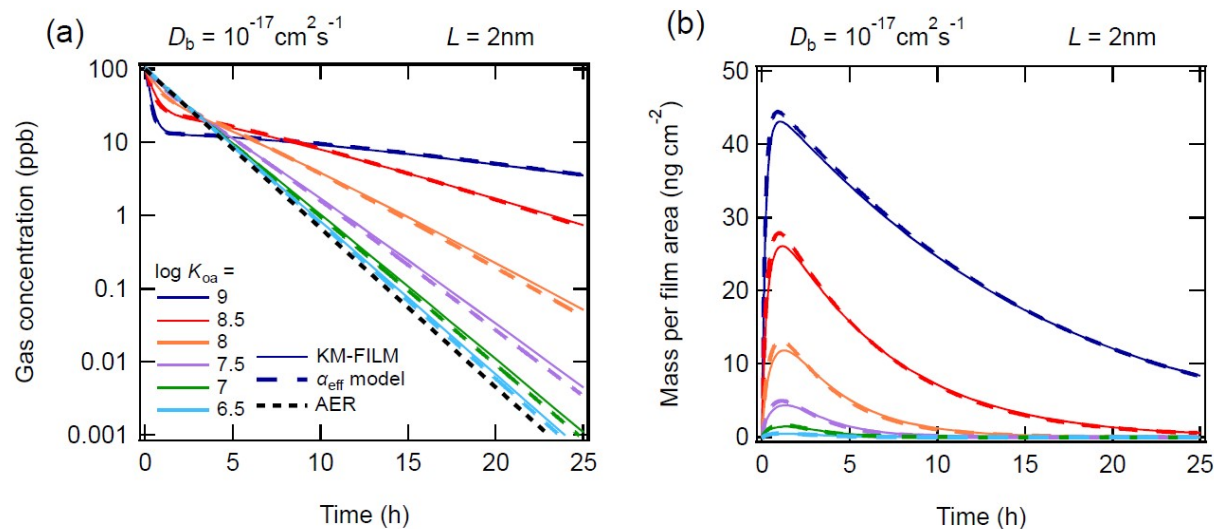

**Figure S9:** The time evolution of (a) gas-phase concentrations and (b) the mass per film area of SVOCs with different partitioning coefficients after these species are added to a room for five minutes at a constant concentration of 100 ppb. The film thickness is set to 2 nm and the bulk diffusion coefficient is  $10^{-17} \text{ cm}^2 \text{ s}^{-1}$ . The air-exchange rate is  $0.5 \text{ h}^{-1}$  and the surface to volume ratio of the room is  $2.5 \text{ m}^{-1}$ . Solid lines represent results from the KM-FILM model and dashed lines are results from the  $\alpha_{eff}$  model. The dashed black line represents the expected concentration if species are removed at the air-exchange rate.

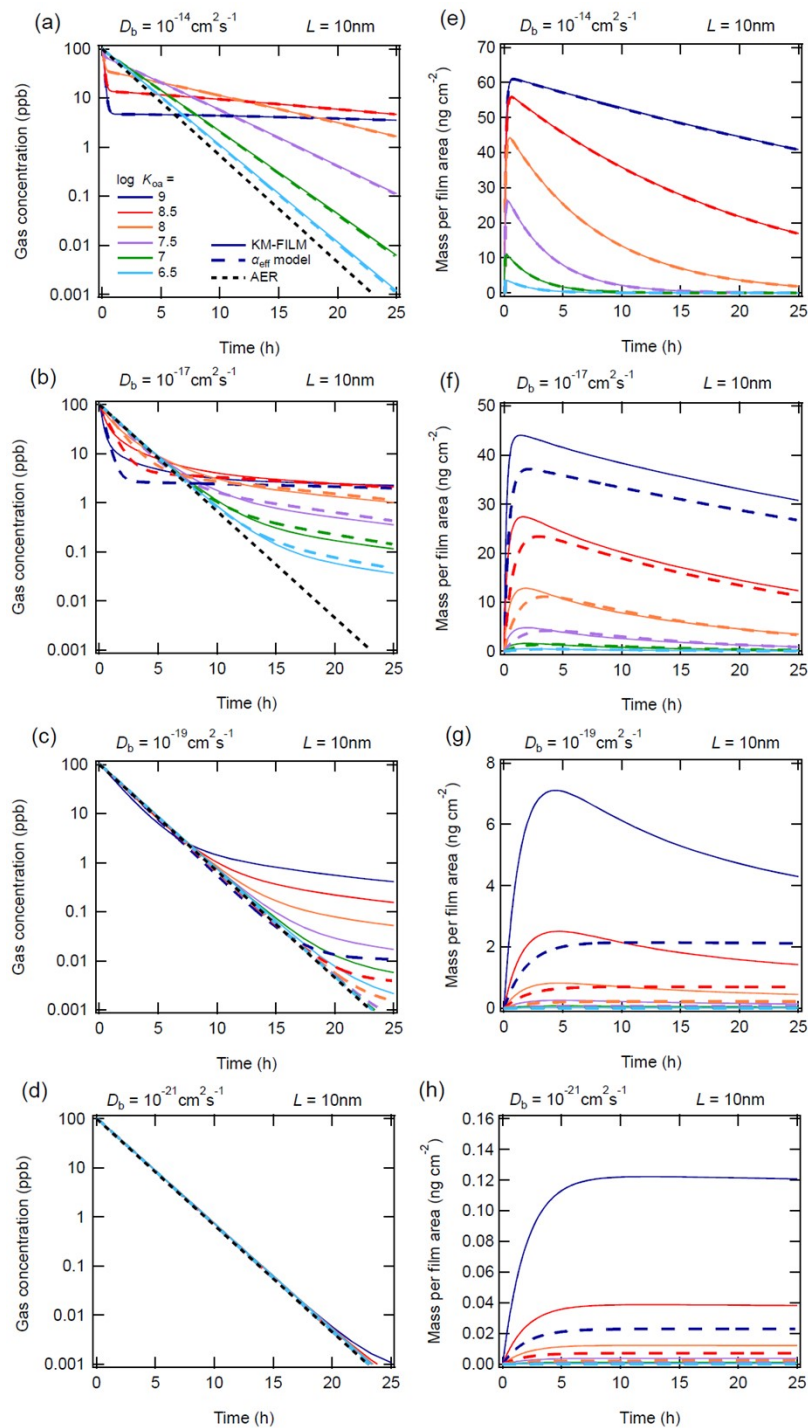

79

80 **Figure S10:** The time evolution of (a-d) gas-phase concentrations and (e-h) the mass per film area of  
81 SVOCs with different partitioning coefficients after these species are added to a room for five minutes at a  
82 constant concentration of 100ppb. The film thickness is set to 10nm and the bulk diffusion coefficients are  
83 (a and e)  $10^{-14} \text{ cm}^2 \text{ s}^{-1}$ , (b and f)  $10^{-17} \text{ cm}^2 \text{ s}^{-1}$ , (c and g)  $10^{-19} \text{ cm}^2 \text{ s}^{-1}$  and (d and h)  $10^{-21} \text{ cm}^2 \text{ s}^{-1}$ . The air-  
84 exchange rate is  $0.5 \text{ h}^{-1}$  and the surface to volume ratio of the room is  $2.5 \text{ m}^{-1}$ . Solid lines represent results  
85 from the KM-FILM model and dashed lines are results from the  $\alpha_{\text{eff}}$  model. The dashed black line represents  
86 the expected concentration if species are removed at the air-exchange rate.

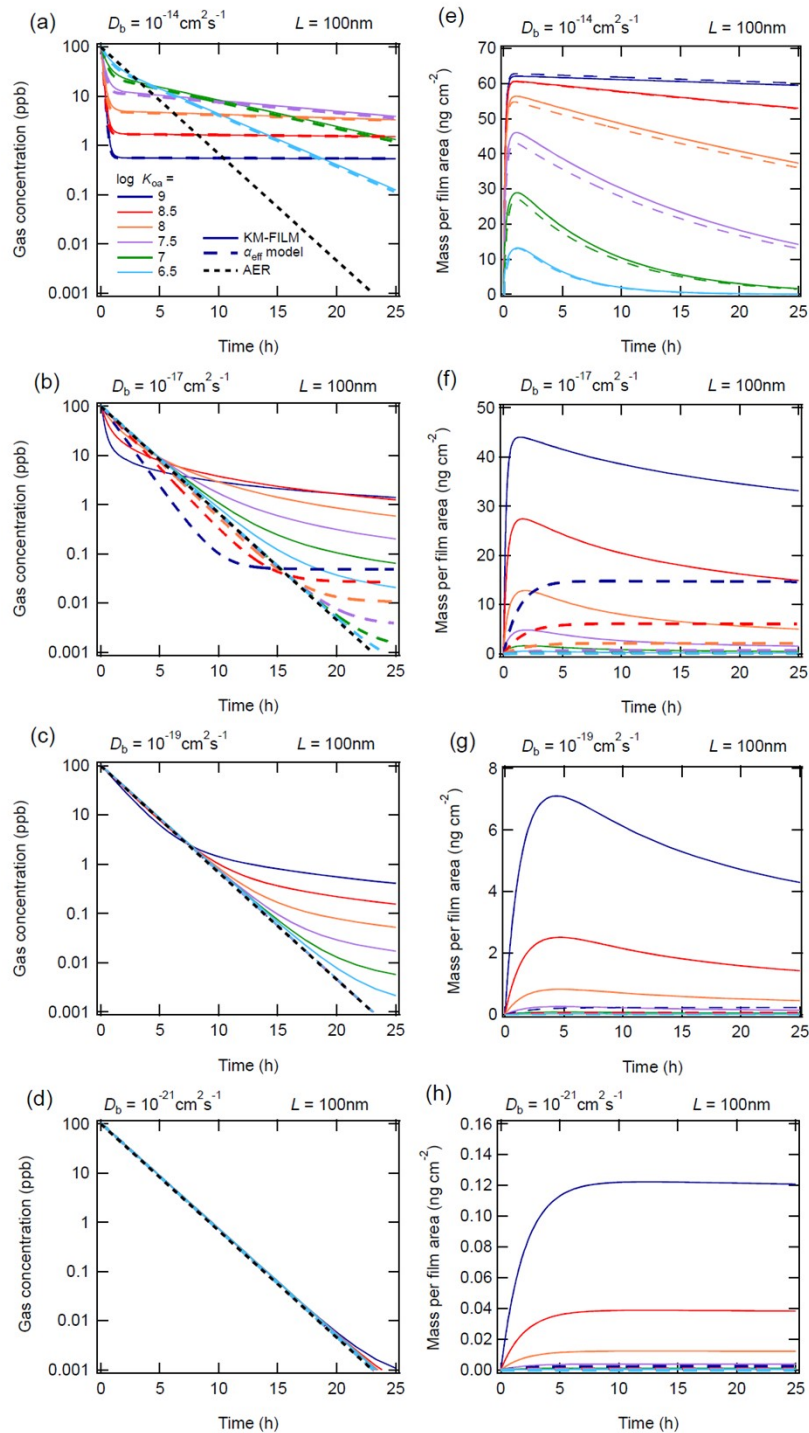

87

88 **Figure S11:** The time evolution of (a-d) gas-phase concentrations and (e-h) the mass per film area of  
 89 SVOCs with different partitioning coefficients after these species are added to a room for five minutes at a  
 90 constant concentration of 100ppb. The film thickness is set to 100nm and the bulk diffusion coefficients  
 91 are (a and e)  $10^{-14} \text{ cm}^2 \text{ s}^{-1}$ , (b and f)  $10^{-17} \text{ cm}^2 \text{ s}^{-1}$ , (c and g)  $10^{-19} \text{ cm}^2 \text{ s}^{-1}$  and (d and h)  $10^{-21} \text{ cm}^2 \text{ s}^{-1}$ . The air-  
 92 exchange rate is  $0.5 \text{ h}^{-1}$  and the surface to volume ratio of the room is  $2.5 \text{ m}^{-1}$ . Solid lines represent results  
 93 from the KM-FILM model and dashed lines are results from the  $\alpha_{\text{eff}}$  model. The dashed black line represents  
 94 the expected concentration if species are removed at the air-exchange rate.

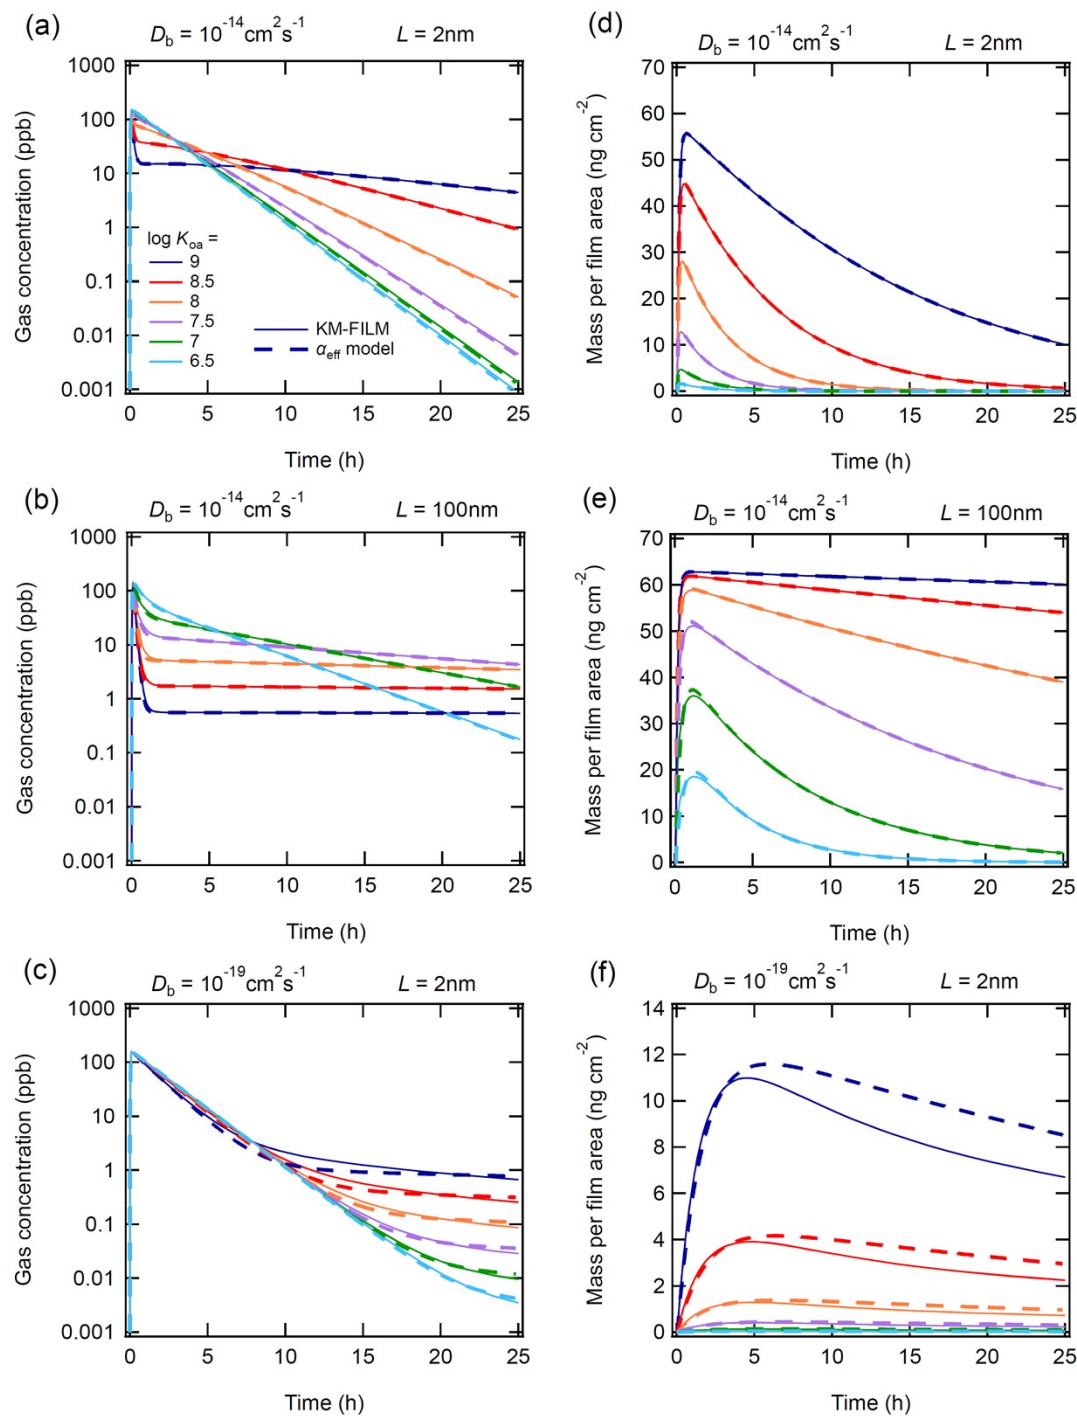

**Figure S12:** The time evolution of (a-c) gas-phase concentrations and (d-f) the mass per film area of SVOCs with different partitioning coefficients after these species are added to a room at a constant emission rate of  $0.55 \text{ ppb s}^{-1}$ . The conditions of the simulations are as follows (a and d)  $D_b = 10^{-14} \text{ cm}^2 \text{ s}^{-1}$ ,  $L = 2 \text{ nm}$ , (b and e)  $D_b = 10^{-14} \text{ cm}^2 \text{ s}^{-1}$ ,  $L = 100 \text{ nm}$ , (c and f)  $D_b = 10^{-19} \text{ cm}^2 \text{ s}^{-1}$ ,  $L = 2 \text{ nm}$ .

## 102 Tables

103 **Table S1:** Parameters used in the models unless specifically stated in the text or figure captions. Note that  
 104 the parameters for all species are set to the same value unless specifically stated.

| Parameter        | Description                                                                   | Value                                                                                                                                                             | Comments                                                                                                                                               |
|------------------|-------------------------------------------------------------------------------|-------------------------------------------------------------------------------------------------------------------------------------------------------------------|--------------------------------------------------------------------------------------------------------------------------------------------------------|
| $\alpha_s$       | Surface mass accommodation                                                    | 1                                                                                                                                                                 | Consistent with molecular dynamic simulations <sup>1,2</sup>                                                                                           |
| $\omega$         | Mean thermal velocity                                                         | $1.59 \times 10^4 \text{ cm s}^{-1}$                                                                                                                              | Calculated for a molecular weight of $250 \text{ g mol}^{-1}$                                                                                          |
| $D_b$            | Bulk diffusion coefficient                                                    | $10^{-24} - 10^{-6} \text{ cm}^2 \text{ s}^{-1}$                                                                                                                  | See text                                                                                                                                               |
| $L$              | Film thickness                                                                | Various (nm)                                                                                                                                                      | See text                                                                                                                                               |
| $l$              | Distance that molecules adsorbed on the surface must travel to enter the bulk | 0.75 nm                                                                                                                                                           | Assuming the molecular weight and density shown below                                                                                                  |
| $MW$             | Molecular weight                                                              | $250 \text{ g mol}^{-1}$                                                                                                                                          | Assumed value                                                                                                                                          |
| $\rho$           | Bulk-phase density of the molecule, particle or film                          | $1 \text{ g cm}^{-3}$                                                                                                                                             | Assumed value                                                                                                                                          |
| $D_g$            | Gas diffusion rate coefficient                                                | $0.04 \text{ cm}^2 \text{ s}^{-1}$                                                                                                                                | Assumed value                                                                                                                                          |
| $\phi$           | Boundary layer length next to the surface                                     | 0.48 cm                                                                                                                                                           | $0.04/0.48 = 0.0833 \text{ cm s}^{-1} = 3 \text{ m h}^{-1}$ which is equivalent to the deposition velocity used in Weschler and Nazaroff. <sup>3</sup> |
| $C_{t,Koa=8.5}$  | Total airborne concentration of species with $K_{oa} = 8.5$                   | $20 \text{ } \mu\text{g m}^{-3}$ (constant gas-phase concentration model).                                                                                        | This relates only to the constant gas-phase concentration model. Values are for consistency with the Weschler and Nazaroff publication. <sup>4</sup>   |
| $C_{t,Koa=9.5}$  | Total airborne concentration of species with $K_{oa} = 9.5$                   | $15 \text{ } \mu\text{g m}^{-3}$ (constant concentration model)                                                                                                   |                                                                                                                                                        |
| $C_{t,Koa=10.5}$ | Total airborne concentration of species with $K_{oa} = 10.5$                  | $10 \text{ } \mu\text{g m}^{-3}$ (constant concentration model)                                                                                                   |                                                                                                                                                        |
| $C_{t,Koa=11.5}$ | Total airborne concentration of species with $K_{oa} = 11.5$                  | $5 \text{ } \mu\text{g m}^{-3}$ (constant concentration model)                                                                                                    |                                                                                                                                                        |
| $C_{t,Koa=12.5}$ | Total airborne concentration of species with $K_{oa} = 12.5$                  | $2 \text{ } \mu\text{g m}^{-3}$ (constant concentration model)                                                                                                    | Assumes a rapid release of a specific chemical compound.                                                                                               |
| $C_g$            | Gas-phase concentration                                                       | Calculated using equation E14 for the constant gas-phase concentration model. Constant 100 ppb for the initial 5 minutes for the changing gas-phase concentration |                                                                                                                                                        |

|                   |                                                                        |                                                                                      |                                                                               |
|-------------------|------------------------------------------------------------------------|--------------------------------------------------------------------------------------|-------------------------------------------------------------------------------|
|                   |                                                                        | model.                                                                               |                                                                               |
| $TSP$             | Total airborne suspended particle concentration                        | $20 \mu\text{g m}^{-3}$                                                              | For consistency with the Weschler and Nazaroff publication. <sup>5</sup>      |
| $fom\_TSP$        | Volume fraction of organic matter in the particle                      | 0.4                                                                                  |                                                                               |
| $S_{\text{room}}$ | Surface area of the room                                               | $250 \text{ m}^2$                                                                    |                                                                               |
| $V_{\text{room}}$ | Volume of the room                                                     | $100 \text{ m}^3$                                                                    | These value give a typical $S/V$ ratio of $2.5 \text{ m}^{-1}$ . <sup>6</sup> |
| $AER$             | Air exchange rate                                                      | $0.5 \text{ h}^{-1}$                                                                 |                                                                               |
| $k_{\text{gp}}$   | First-order gas-particle mass transfer coefficient                     | $0 \text{ s}^{-1}$                                                                   | Typical value for a residential home. <sup>7, 8</sup>                         |
| $k_{\text{g}}$    | Pseudo-first-order chemical reaction rate coefficient in the gas-phase | $0 \text{ s}^{-1}$                                                                   | For simplicity when running the model                                         |
| $C_{\text{out}}$  | The concentration outside of the room                                  | $0 \mu\text{g m}^{-3}$                                                               |                                                                               |
| $E$               | Emission rate inside the room                                          | $0 \mu\text{g m}^{-3} \text{ s}^{-1}$ or $\text{ppb s}^{-1}$ unless otherwise stated |                                                                               |

105

106 **Table S2:** Peak gas-phase concentrations and mass per film area for species with a  $\log K_{\text{oa}}$  of 9 and 6.5.  
107 Simulations were performed with different  $D_{\text{b}}$  and  $L$  values and either a constant 100 ppb concentration or  
108 an emission rate of  $0.55 \text{ ppb s}^{-1}$  over the first five minutes.

| Conditions                                                                    | Peak gas-phase concentration (ppb) (emission rate of $0.55 \text{ ppb s}^{-1}$ ) | Peak mass per film area ( $\text{ng cm}^{-2}$ ) (emission rate of $0.55 \text{ ppb s}^{-1}$ ) | Peak mass per film area ( $\text{ng cm}^{-2}$ ) (constant 100 ppb conditions) |
|-------------------------------------------------------------------------------|----------------------------------------------------------------------------------|-----------------------------------------------------------------------------------------------|-------------------------------------------------------------------------------|
| $D_{\text{b}} = 10^{-14} \text{ cm}^2 \text{ s}^{-1}$<br>$L = 2 \text{ nm}$   | 121 ( $\log K_{\text{oa}} = 9$ )<br>157 ( $\log K_{\text{oa}} = 6.5$ )           | 55.6 ( $\log K_{\text{oa}} = 9$ )<br>1.6 ( $\log K_{\text{oa}} = 6.5$ )                       | 55.0 ( $\log K_{\text{oa}} = 9$ )<br>1.0 ( $\log K_{\text{oa}} = 6.5$ )       |
| $D_{\text{b}} = 10^{-14} \text{ cm}^2 \text{ s}^{-1}$<br>$L = 100 \text{ nm}$ | 120 ( $\log K_{\text{oa}} = 9$ )<br>149 ( $\log K_{\text{oa}} = 6.5$ )           | 62.8 ( $\log K_{\text{oa}} = 9$ )<br>18.6 ( $\log K_{\text{oa}} = 6.5$ )                      | 62.1 ( $\log K_{\text{oa}} = 9$ )<br>13.2 ( $\log K_{\text{oa}} = 6.5$ )      |
| $D_{\text{b}} = 10^{-19} \text{ cm}^2 \text{ s}^{-1}$<br>$L = 2 \text{ nm}$   | 159 ( $\log K_{\text{oa}} = 9$ )<br>160 ( $\log K_{\text{oa}} = 6.5$ )           | 11.0 ( $\log K_{\text{oa}} = 9$ )<br>0.04 ( $\log K_{\text{oa}} = 6.5$ )                      | 7.1 ( $\log K_{\text{oa}} = 9$ )<br>0.03 ( $\log K_{\text{oa}} = 6.5$ )       |

109

110

111

## 112 References

- 113 1. M. von Domaros, P. S. Lakey, M. Shiraiwa and D. J. Tobias, Multiscale Modeling of Human  
114 Skin Oil-Induced Indoor Air Chemistry: Combining Kinetic Models and Molecular Dynamics, *J.*  
115 *Phys. Chem. B*, 2020, **124**, 3836-3843.  
116 2. J. Julin, P. M. Winkler, N. M. Donahue, P. E. Wagner and I. Riipinen, Near-unity mass  
117 accommodation coefficient of organic molecules of varying structure, *Environ. Sci. Tech.*, 2014,  
118 **48**, 12083-12089.  
119 3. C. J. Weschler and W. W. Nazaroff, Growth of organic films on indoor surfaces, *Indoor Air*,  
120 2017, **27**, 1101-1112.

- 121 4. M. Shiraiwa, C. Pfrang and U. Pöschl, Kinetic multi-layer model of aerosol surface and bulk  
122 chemistry (KM-SUB): the influence of interfacial transport and bulk diffusion on the oxidation of  
123 oleic acid by ozone, *Atmos. Chem. Phys.*, 2010, **10**, 3673-3691.
- 124 5. G. Morrison, P. S. Lakey, J. Abbatt and M. Shiraiwa, Indoor boundary layer chemistry modeling,  
125 *Indoor Air*, 2019, **29**, 956-967.
- 126 6. A. Manuja, J. Ritchie, K. Buch, Y. Wu, C. M. Eichler, J. C. Little and L. C. Marr, Total surface  
127 area in indoor environments, *Environ. Sci.: Processes Impacts*, 2019, **21**, 1384-1392.
- 128 7. N. Yamamoto, D. Shendell, A. Winer and J. Zhang, Residential air exchange rates in three major  
129 US metropolitan areas: results from the Relationship Among Indoor, Outdoor, and Personal Air  
130 Study 1999–2001, *Indoor Air*, 2010, **20**, 85-90.
- 131 8. M. Yao and B. Zhao, Distribution of air change rates in residential buildings in Beijing, China,  
132 *Proceedings of the 11th International Symposium on Heating, Ventilation and Air Conditioning*  
133 *(ISHVAC 2019) Volume I: Indoor and Outdoor Environment 11*, 2020, 1149-1156.

134
